# Supplementary material for: Correlation between antioxidant and anticancer activity and phenolic profile of new Apulian table grape genotypes (V. Vinifera L.)
Source: Front Plant Sci. 2023 Jan 11;13:1064023. doi: 10.3389/fpls.2022.1064023 (PMC9874228; doi:10.3389/fpls.2022.1064023)
Supplement: Supplementary file 1 [file Table_1.xlsx]

## Sheet: Table S1
Table S1. M+ mean signal intensities of the anthocyanins identified in the grape samples normalized to the IS. SD, semi-dispersive data for two grape samples.
anthocyanins	Genotype 1	SD	Genotype 2	SD	Genotype 3	SD	Genotype 4	SD	Genotype 5	SD	Genotype 6	SD	Genotype 7	SD	Genotype 8	SD	Genotype 9	SD	Genotype 10	SD
cyanidin-3-O-acetylglucoside	82686.5	3304.5	621555	5875	550510	4739	22867.5	641.5	60874	3148	2.37963e+06	4417.5	213319	1711	132143	3928	1273199	1315	615384	3891.5
cyanidin-3-O-p-coumaroylglucoside	638865	9736	4.06354e+06	45867.5	2941502	13242	362336	2702	1461280	14044	7.67344e+06	50649.5	2.59493e+06	31013.5	1021693	18021	5.30647e+06	17836.5	4350203	50098
cyanidin-3-O-glucoside	1.57345e+06	12669.5	38023860	87283	1.00181e+07	40382.5	530183	10698	1638657	4374	65635239	265191	4.21313e+06	81110.5	3.303e+06	20934.5	3.03839e+07	40797.5	1.04203e+07	19662.5
delphinidin-3-O-acetylglucoside	244568	2137.5	15050	3033	742420	3061.5	44983.5	1120.5	134908	192	170822	3416	146748	1408.5	251912	2582	243823	2119	1601131	4143
delphinidin-3-O-p-coumaroylmonoglucoside	2.36643e+06	8868.5	1217928	16709	4.25918e+06	15066.5	1.37369e+06	4152.5	3.5397e+06	49584.5	1.16968e+06	17389.5	3277206	732	2.77114e+06	861.5	1616049	12241	1.27706e+07	117946
delphinidin-3-O-glucoside	6998855	86141	1.91051e+06	12163.5	15092610	15164	2159616	3112	5110333	14322	1.16886e+07	116144	4944646	15613	5193084	158299	14460015	23363	3.45418e+07	27880.5
malvidin-3-O-acetylglucoside	61825859	517203	643416	1383.5	88363401	592377	38641802	41747	4.25812e+07	213032	4.42309e+06	47002.5	44625756	327123	6.48511e+07	608546	2243818	29927	7.97804e+07	142504
malvidin-3-O-caffeoylglucoside	46689297	328381	823906	19596	74901347	348772	5.3899e+07	445492	6.58767e+07	121450	2957728	31904	52852399	237103	8.08843e+07	706080	2.16906e+06	62436.5	72145208	505013
malvidin-3-O-p-coumaroylglucoside	133166414	775255	2849992	6490	178782238	450725	131575958	155176	147164687	467229	1.04407e+07	22732.5	136171856	60346	153756474	528216	7.07139e+06	29828.5	2.1241e+08	871556
malvidin-3-O-glucoside	173737885	1425431	1.1163e+07	136064	190432136	3651688	177635408	156889	1.58171e+08	32662.5	28040162	270674	1.50094e+08	880326	1.6915e+08	501582	33404723	83472	207489022	95941
peonidin-3-O-acetylglucoside	2748829	30233	5525576	102244	1.07515e+07	40781.5	1663158	8824	3.96245e+06	22438.5	1.82046e+07	235436	6765881	52202	5337837	106261	3.71084e+06	51190.5	10150026	17223
peonidin-3-O-p-coumaroylglucoside	1.13751e+07	27274.5	2.37428e+07	30635.5	3.27198e+07	247020	8884777	34865	1.80191e+07	4349.5	3.84731e+07	63164.5	35536602	232082	1.59719e+07	123168	14376180	129260	37387499	46690
peonidin-3-O-glucoside	15440304	252426	148354159	480167	62379491	189526	11499335	19112	28194124	42265	1.76083e+08	14304.5	54877460	449410	34521795	359018	9.73122e+07	285062	4.73379e+07	35236.5
petunidin-3-O-acetylglucoside	1716135	8629	72796.5	571.5	4394506	22437	653829	2983	1.0176e+06	2092.5	776070	551.5	1.43693e+06	31370.5	1944456	28469	657586	11714	7.18752e+06	103276
petunidin-3-O-p-coumaroylglucoside	1.17204e+07	60013.5	7888752	85315	1.94333e+07	55059.5	9.43174e+06	9434.5	14338467	42280	11260757	50548	15094362	75951	1.42894e+07	176576	982272	19895.5	3.59735e+07	12342.5
petunidin-3-O-glucoside	23482327	188712	6.8408e+06	33605.5	3.94639e+07	186384	1.41158e+07	37589.5	2.00197e+07	8409.5	23536828	16526	20691684	141316	20169876	121918	2.1177e+07	187658	65020148	428250
