# Supplementary material for: Correlation between antioxidant and anticancer activity and phenolic profile of new Apulian table grape genotypes (V. Vinifera L.)
Source: Front Plant Sci. 2023 Jan 11;13:1064023. doi: 10.3389/fpls.2022.1064023 (PMC9874228; doi:10.3389/fpls.2022.1064023)
Supplement: Supplementary file 2 [file Table_2.xlsx]

## Sheet: Table S2
Table S2. [M-H]- mean signal intensities of the polyphenols identified in the grape samples normalized to the IS. SD, semi-dispersive data for two grape samples.
polyphenols	Genotype 1	SD	Genotype 2	SD	Genotype 3	SD	Genotype 4	SD	Genotype 5	SD	Genotype 6	SD	Genotype 7	SD	Genotype 8	SD	Genotype 9	SD	Genotype 10	SD
phenolic acids
shikimic acid	50220.5	1900.5	38392.5	96.5	72901	9	22465.5	401.5	65946.5	1794.5	74946.5	1297.5	83957.5	5034.5	60298	734	46479	426	12689.5	254.5
methylgallic acid isomer 1	14077	166	28633	434	19254	747	12749	302	14630	757	36885	262	13578.5	110.5	17436.5	104.5	33181.5	425.5	15074.5	694.5
methylgallic acid isomer 2	181740	1220	66997	563	221354	636.5	164562	1750.5	199456	2377.5	153018	2224.5	235600	2070.5	180982	2856.5	94640.5	441.5	88028	2416
5-hydroxy-ferulic acid	14742	387	103837	1862	14448.5	455.5	6711	98	12236.5	580.5	165072	1444.5	19689	124	11462	515	209002	41.5	10889	308
hydroxybenzoic acid glucoside	120158	2141	467146	384.5	735474	1181.5	230425	292	0	0	291505	9328	273940	20200	321456	3907	116618	1794.5	120270	1841.5
dihydroxybenzoic acid glucoside	1.02964e+06	18152.5	1.3774e+06	21711.5	2.41164e+06	1218.5	524738	1153	2491959	10954	1664506	36509	1.50164e+06	29328.5	1901354	2539	787334	20123.5	2.06766e+06	1524.5
feruloyltartaric acid	355668	11036.5	259550	1703.5	854309	6078	103177	740	752520	34025.5	632522	1120.5	214556	14575	208524	214.5	450256	1180.5	491082	1735.5
vanillic acid glucoside	82473	497	80210.5	1014.5	897062	8442.5	264200	3158.5	425140	7893.5	276540	799.5	118756	3004.5	156088	1660	63763.5	1084.5	39524.5	45.5
gallic acid glucoside	2.60612e+06	46508.5	2.48714e+06	7627.5	8.64298e+06	113682	1.39901e+06	28086.5	4142427	48624	6.52305e+06	79165.5	5.66917e+06	190002	7.64659e+06	181210	1.04285e+06	27553.5	7083778	15708
ferulic acid glucoside	24671.5	212.5	10698.5	158.5	33490.5	681.5	15617	1431	114768	749	26592	664	8698	143	61146.5	884.5	12024	713	42136	337
syringic acid glucoside	706964	7996	82626.5	11.5	1.06614e+06	2596.5	428635	1627	567064	7278.5	121598	3185	812260	9467.5	1019951	5964	69347	621	750962	7604.5
cis-p-coumaroyltartaric acid	0	0	3648.5	163.5	540	126	0	0	1154	88	2237.5	18.5	0	0	312.5	40.5	1455.5	298.5	3161	459
trans-p-coumaroyltartaric acid	127.5	2.5	3997.5	229.5	2970	50	726	2	5966	369	1541	93	483.5	95.5	329.5	17.5	3317	195	2096	50
trans-caffeoyltartaric acid	2686	160	7620.5	225.5	5235.5	618.5	1787.5	612.5	17263.5	592.5	4069.5	286.5	2429	64	4158.5	230.5	6533.5	36.5	46838.5	498.5
flavonols/flavanonols
kaempferol	35519.5	1740.5	249880	3361	117336	2964	172072	2307	229282	346.5	168714	7998.5	129127	1113	129558	1767.5	73009	567	48000	168
quercetin	889432	1259	3663108	27879	837990	2522.5	1609411	32273	1339475	25	2.52417e+06	23335.5	1213286	10526	552080	11082.5	1.69472e+06	3583.5	1038350	10923
tamarixetin/isorhamnetin	504660	3703.5	2889426	18015	2472058	20289	1102862	2962	826738	6399.5	3.60221e+06	21639.5	2746280	16781	927252	6015.5	2216095	30585	965840	20679.5
myricetin	660286	11213	39948	359	539570	386	296021	1423	154988	2761	148331	1278	478519	1556	147986	2781.5	268664	3984.5	963296	18470
syringetin	2.42867e+06	25024.5	144697	1482	4.35832e+06	38371.5	2283864	16543	1.58177e+06	21058.5	461431	1395	2.05992e+06	20273.5	2187726	3751	447242	3923.5	2714722	31526
quercetin-pentoside	11133	158	433571	5702	59917	224	10720	470	18590.5	457.5	85610	747	10294.5	377.5	223228	1451	27538	153	195218	2414.5
taxifolin-pentoside	17646	205	52747.5	652.5	2607	116	0	0	0	0	0	0	0	0	19048	263	14474	725	0	0
kaempferol-3-O-galactoside	7178.5	132.5	67360.5	1532.5	15586.5	239.5	12358.5	851.5	101023	997	65286	110	9614	406	37235.5	842.5	24534.5	53.5	6938	269
kaempferol-3-O-glucoside	43476	402	388744	5950.5	191066	1641.5	266530	523	816826	12730	435248	6457.5	95511	1425	527736	21759	88639.5	417.5	6858.5	45.5
dihydroquercetin-3-O-rhamnoside	721189	5913	1251926	14266	62447	916	7695	219	6147.5	92.5	6985.5	476.5	3676	58	549227	7382	502670	7411.5	17093	1139
tetrahydroxyflavanone-hexoside 1	8745	462	13341.5	305.5	5285	322	6727	264	10350.5	704.5	13583.5	579.5	8716	482	10312.5	245.5	10822	46	2678	377
tetrahydroxyflavanone-hexoside 2	0	0	7989.5	15.5	1873	19	1109	355	1644.5	83.5	83916.5	882.5	8470	1302	4953.5	144.5	11644	410	58128	2270
kaempferol-3-O-glucuronide	4671.5	154.5	32837.5	180.5	7382.5	132.5	19770.5	1443.5	55762.5	720.5	19165.5	1200.5	95511.5	1430.5	28462.5	803.5	12143	867	17919.5	1200.5
quercetin-3-O-galactoside	174197	4413	512194	855	133356	3485.5	142800	3534.5	325890	4466.5	419529	240	85467.5	910.5	421390	8891.5	129248	5005.5	698629	625
quercetin-3-O-glucoside	505178	10157.5	3404772	7639	1.43811e+06	3501.5	1228637	8256	1779990	18521	3731747	12937	1.41533e+06	17625.5	1564016	24611	2202300	10897	929032	14233.5
quercetin-3-O-glucuronide	4.04064e+06	44540.5	5155726	45680	3388565	35872	4.68812e+06	34819.5	5091169	23615	4.64148e+06	97258.5	3.14847e+06	56622.5	3.87043e+06	42341.5	4.22883e+06	83648.5	5.19975e+06	25299.5
isorhamnetin-3-O-glucoside	329383	1104	1006488	14605	876254	9875.5	945226	1397.5	1150134	3463	2873610	35501	1.08174e+06	11210.5	731825	5766	1.32093e+06	11806.5	416686	3114.5
myricetin-3-O-glucoside	3.54227e+06	38994.5	448955	5331	2964086	7939	2.23052e+06	17921.5	1.46952e+06	21410.5	1.52075e+06	18194.5	2.29194e+06	13331.5	1770514	19229	1783137	27172	4579738	20482
myricetin-3-O-glucuronide	579348	3440.5	86771	1451	325428	3936	462613	6013	233930	11932.5	149398	974	422019	4567	192724	1667.5	137375	265	941364	6588
laricitrin-3-O-glucoside	1049663	27469	28083	541	736583	1	874508	1412.5	252423	1219	56224	44	747826	6476	563681	10514	90003	199	804521	17465
laricitrin-glucuronide	94523	3860	2480	32	62417.5	921.5	120918	1095.5	31333.5	587.5	9111.5	125.5	82140.5	506.5	53736	1613	6705	27	120330	664
syringetin-3-O-glucoside	1.70885e+06	14587.5	45766	453	1.57689e+06	19425.5	2475212	53719	1276105	7583	465612	11952	1634257	8430	1.05845e+06	26442.5	376007	3792	1034440	5013
tetrahydroxy-dimethoxyflavanone- hexoside	4.26679e+06	91667.5	144368	81.5	2284678	29675	6035129	41728	1.0381e+06	46144.5	1520235	21710	2873689	105775	2.124e+06	6381.5	1.15045e+06	17742.5	4015447	3936
rutin (quercetin-3-O-rutinoside)	295362	6277	792706	19264.5	159350	30490.5	268862	3114.5	1136048	4726	1362010	25549	80970.5	3093.5	978248	16784	762152	12198.5	591656	3003.5
isorhamnetin p-coumaroylglucoside	43917.5	322.5	44714	420	151586	588	43085	603	42427.5	78.5	68151	811	148092	662	43281.5	1325.5	17592	478	157595	328
quercetin-diglucoside	7486.5	144.5	24834.5	123.5	42774	938	28547.5	475.5	12703.5	229.5	56459	1650	24970.5	5.5	35277	4412	23337	44	19498.5	565.5
dihydroquercetin-O-hexoside 1	406484	4773.5	10276.5	601.5	23958.5	679.5	4664.5	409.5	5516	152	22289	985	7424.5	475.5	150542	2076.5	20853.5	1281.5	7427	310
dihydroquercetin-O-hexoside 2	80758.5	1418.5	64680.5	2034.5	60048	119	51286.5	911.5	116702	1763	88386	4810	63155.5	752.5	89871	2646	92897	1536	75590.5	1435.5
flavanols/proanthocyanidins
(-)-epicatechin	69459.5	1742.5	81891	1549	32442	257	91709.5	815.5	82590	1259	31249	43	33607	53	44393.5	1262.5	30818	2279	77282.5	1671.5
(+)-catechin	739900	11960	299744	7156.5	143131	1306	1.2505e+06	44850.5	1.38012e+06	10678.5	37260.5	1144.5	357768	29288	532995	8962	84979	3702	432550	7357.5
(epi)gallocatechin isomer	482758	8619.5	192022	844.5	131776	396.5	161412	368.5	518750	10371	117600	2614.5	129358	1572.5	243800	72	251132	2299.5	1488193	50713
(-)-epicatechin gallate	14089.5	657.5	21091	108	4875.5	130.5	6818	388	11850.5	284.5	9828.5	361.5	6115	232	8739	111	11455.5	52.5	15524.5	242.5
procyanidin (B3/B4/B5)	358497	6538	279706	1819.5	66360	1218	142803	558	311330	4257	106369	480	70131.5	258.5	119660	5597.5	79931.5	692.5	573972	14028.5
procyanidin B1	3505761	41265	5129489	60993	1.17585e+06	3366.5	928537	1596	3286467	2845	1774975	1025	740518	172922	1.47241e+06	18048.5	1173264	8601	2.81553e+06	67014.5
procyanidin B2	54669	873	118212	5316	19714.5	1702.5	19665	2552	51147	1799	8634	266	18100	494	15924.5	1119.5	42275	981	23259	794
(epi)gallocatechin-catechin 1	324118	1837.5	261731	2749	137825	6	28873	119	531909	3354	114563	984	66332	155	122136	1463	201742	2116	1722380	8416
(epi)gallocatechin-catechin 2	345414	5469	375114	2713.5	122162	632	44650.5	197.5	425583	6516	114267	2393	64638.5	450.5	111223	2667	197750	838.5	1.42668e+06	22351.5
procyanidin T2, T3 (T4), C1_A	1099357	14444	1494815	14311	291454	4401.5	193444	905.5	1081858	13096	417002	3424	208593	7647	305958	7469.5	240032	2117	762623	535
procyanidin T2, T3 (T4), C1_B	319702	9244.5	535368	1428.5	102186	610	65464.5	300.5	319748	1642	151542	3922	69977.5	2410.5	101533	4243	96805	731	300712	4405
procyanidin T2, T3 (T4), C1_C	175728	198.5	295004	2418	97657.5	1149.5	72510	437	99692.5	901.5	107293	2078	70931.5	1283.5	49056.5	546.5	81526	4235	140756	570
prodelphinidin T2, T3_A	329649	1989	250460	2197	101652	615	45804.5	365.5	292590	3005.5	96969.5	1128.5	46914.5	595.5	93543.5	861.5	136686	457.5	826138	52.5
prodelphinidin T2, T3_B	58835	572	41085.5	240.5	22128	536	15743.5	205.5	46924	373	17795	940	11070.5	255.5	17222	92	24017.5	138.5	92575.5	2997.5
prodelphinidin T1	68028	150	25382.5	35.5	20830.5	294.5	5534.5	317.5	56161.5	715.5	26965	2709	10672.5	331.5	24403	226	55807.5	741.5	302580	519.5
stilbene derivatives
trans-resveratrol	3879	142	5700	457	2741.5	234.5	2071	63	2483.5	109.5	10845	525	4719	239	11685	236	4569	6	1535	457
piceatannol	18601.5	594.5	24696.5	289.5	16769	404	16659.5	331.5	7401	21	108742	1202.5	25054.5	234.5	95953	656	69970.5	1554.5	17619.5	124.5
cis-piceid	3545	63	3636	262	16937.5	217.5	1320	391	2063	64	99010.5	310.5	16202.5	488.5	20527	658	48979.5	942.5	7502.5	52.5
trans-piceid	1235	22	391.5	15.5	5908	22	2478	257	548	181	14379.5	337.5	10859	107	4483	111	20353	174	2228	41
E-astringin	10552.5	154.5	1655.5	199.5	19198	339	3165.5	112.5	1445.5	153.5	65534	1627	41371	1107	23436.5	1939.5	66831	464	30309.5	300.5
Z-astringin	0	0	0	0	2026	212	0	0	0	0	14455.5	733.5	2430.5	37.5	4320.5	147.5	7461	269	1710	156
pallidol	129652	2059.5	80947.5	1878.5	187394	844	40799	379	16507	270	755192	10584.5	786768	998	289760	3532	707551	6840	20660.5	1087.5
resveratrol dimer	115702	2886.5	17467	307	50297	990	12075	444	3858.5	770.5	212118	6440.5	153622	1123.5	47169	251	284870	3882	57087.5	1401.5
Z-e-viniferin	465329	8264	79765.5	139.5	153230	846.5	25652	32	47236	825	141509	2536	331327	5514	229434	3600.5	414911	5813	40025.5	1114.5
Z-ω-viniferin	308074	1235	34882	1252	100876	1547	60265	2241	12534.5	1795.5	147037	3555	379050	2310.5	113422	3441.5	229894	3806.5	194887	294
E-e-viniferin	1.20288e+06	15840.5	134468	1701	295318	3011.5	426744	291.5	255406	2436.5	274314	3420	662366	5524.5	433038	1080	529034	7522.5	160054	1681
d-viniferin	55127.5	1943.5	20702.5	68.5	166170	2333.5	63670.5	1431.5	41065.5	1403.5	82936	1038	897056	5309.5	241094	1297.5	142340	803	10424	218
pallidol-3-O-glucoside	18874.5	424.5	4892	203	4334.5	142.5	1999	67	1537.5	355.5	125666	2335.5	120184	747.5	8578	23	94825	132	1853.5	337.5
a-viniferin	12079.5	2524.5	99636.5	184.5	15185.5	605.5	127334	2717.5	23289.5	406.5	73758	1684	863596	5749	41037	32	43854	10	4464	153
Z-miyabenol C	194468	4852	204479	2118	353463	4576	25999.5	1151.5	11112	287	499943	673	1.77325e+06	145364	313872	1302.5	731652	7918.5	67085	1269
E-miyabenol C	504768	10240	362776	2163	181616	2989.5	474172	7351	68467	540	679016	6989.5	1015652	3417	252018	2282	497006	10706	81723	1475
resveratrol tetramer 1	227851	1002	100021	639	381234	866	128110	751.5	32847	614	221418	2794.5	994162	11184.5	210718	3100.5	709804	1123.5	65069	1607
resveratrol tetramer 2	194007	1026	118095	2172	319683	4369	60403	201	12169.5	44.5	281410	4533.5	1.04279e+06	5328.5	180564	1786.5	1.02888e+06	4288.5	56192.5	1303.5
